# Supplementary material for: β‐Glucan Subverts the Function of Myeloid Cells in Neonates
Source: Hindawi journal article supplement (doi:10.1155/2024/2765001), 2024-01-01
Supplement: f1 [file 2765001.f1.pdf]

# Figure S1. mRNA transcripts of ROS production molecules on PMN-MDSCs

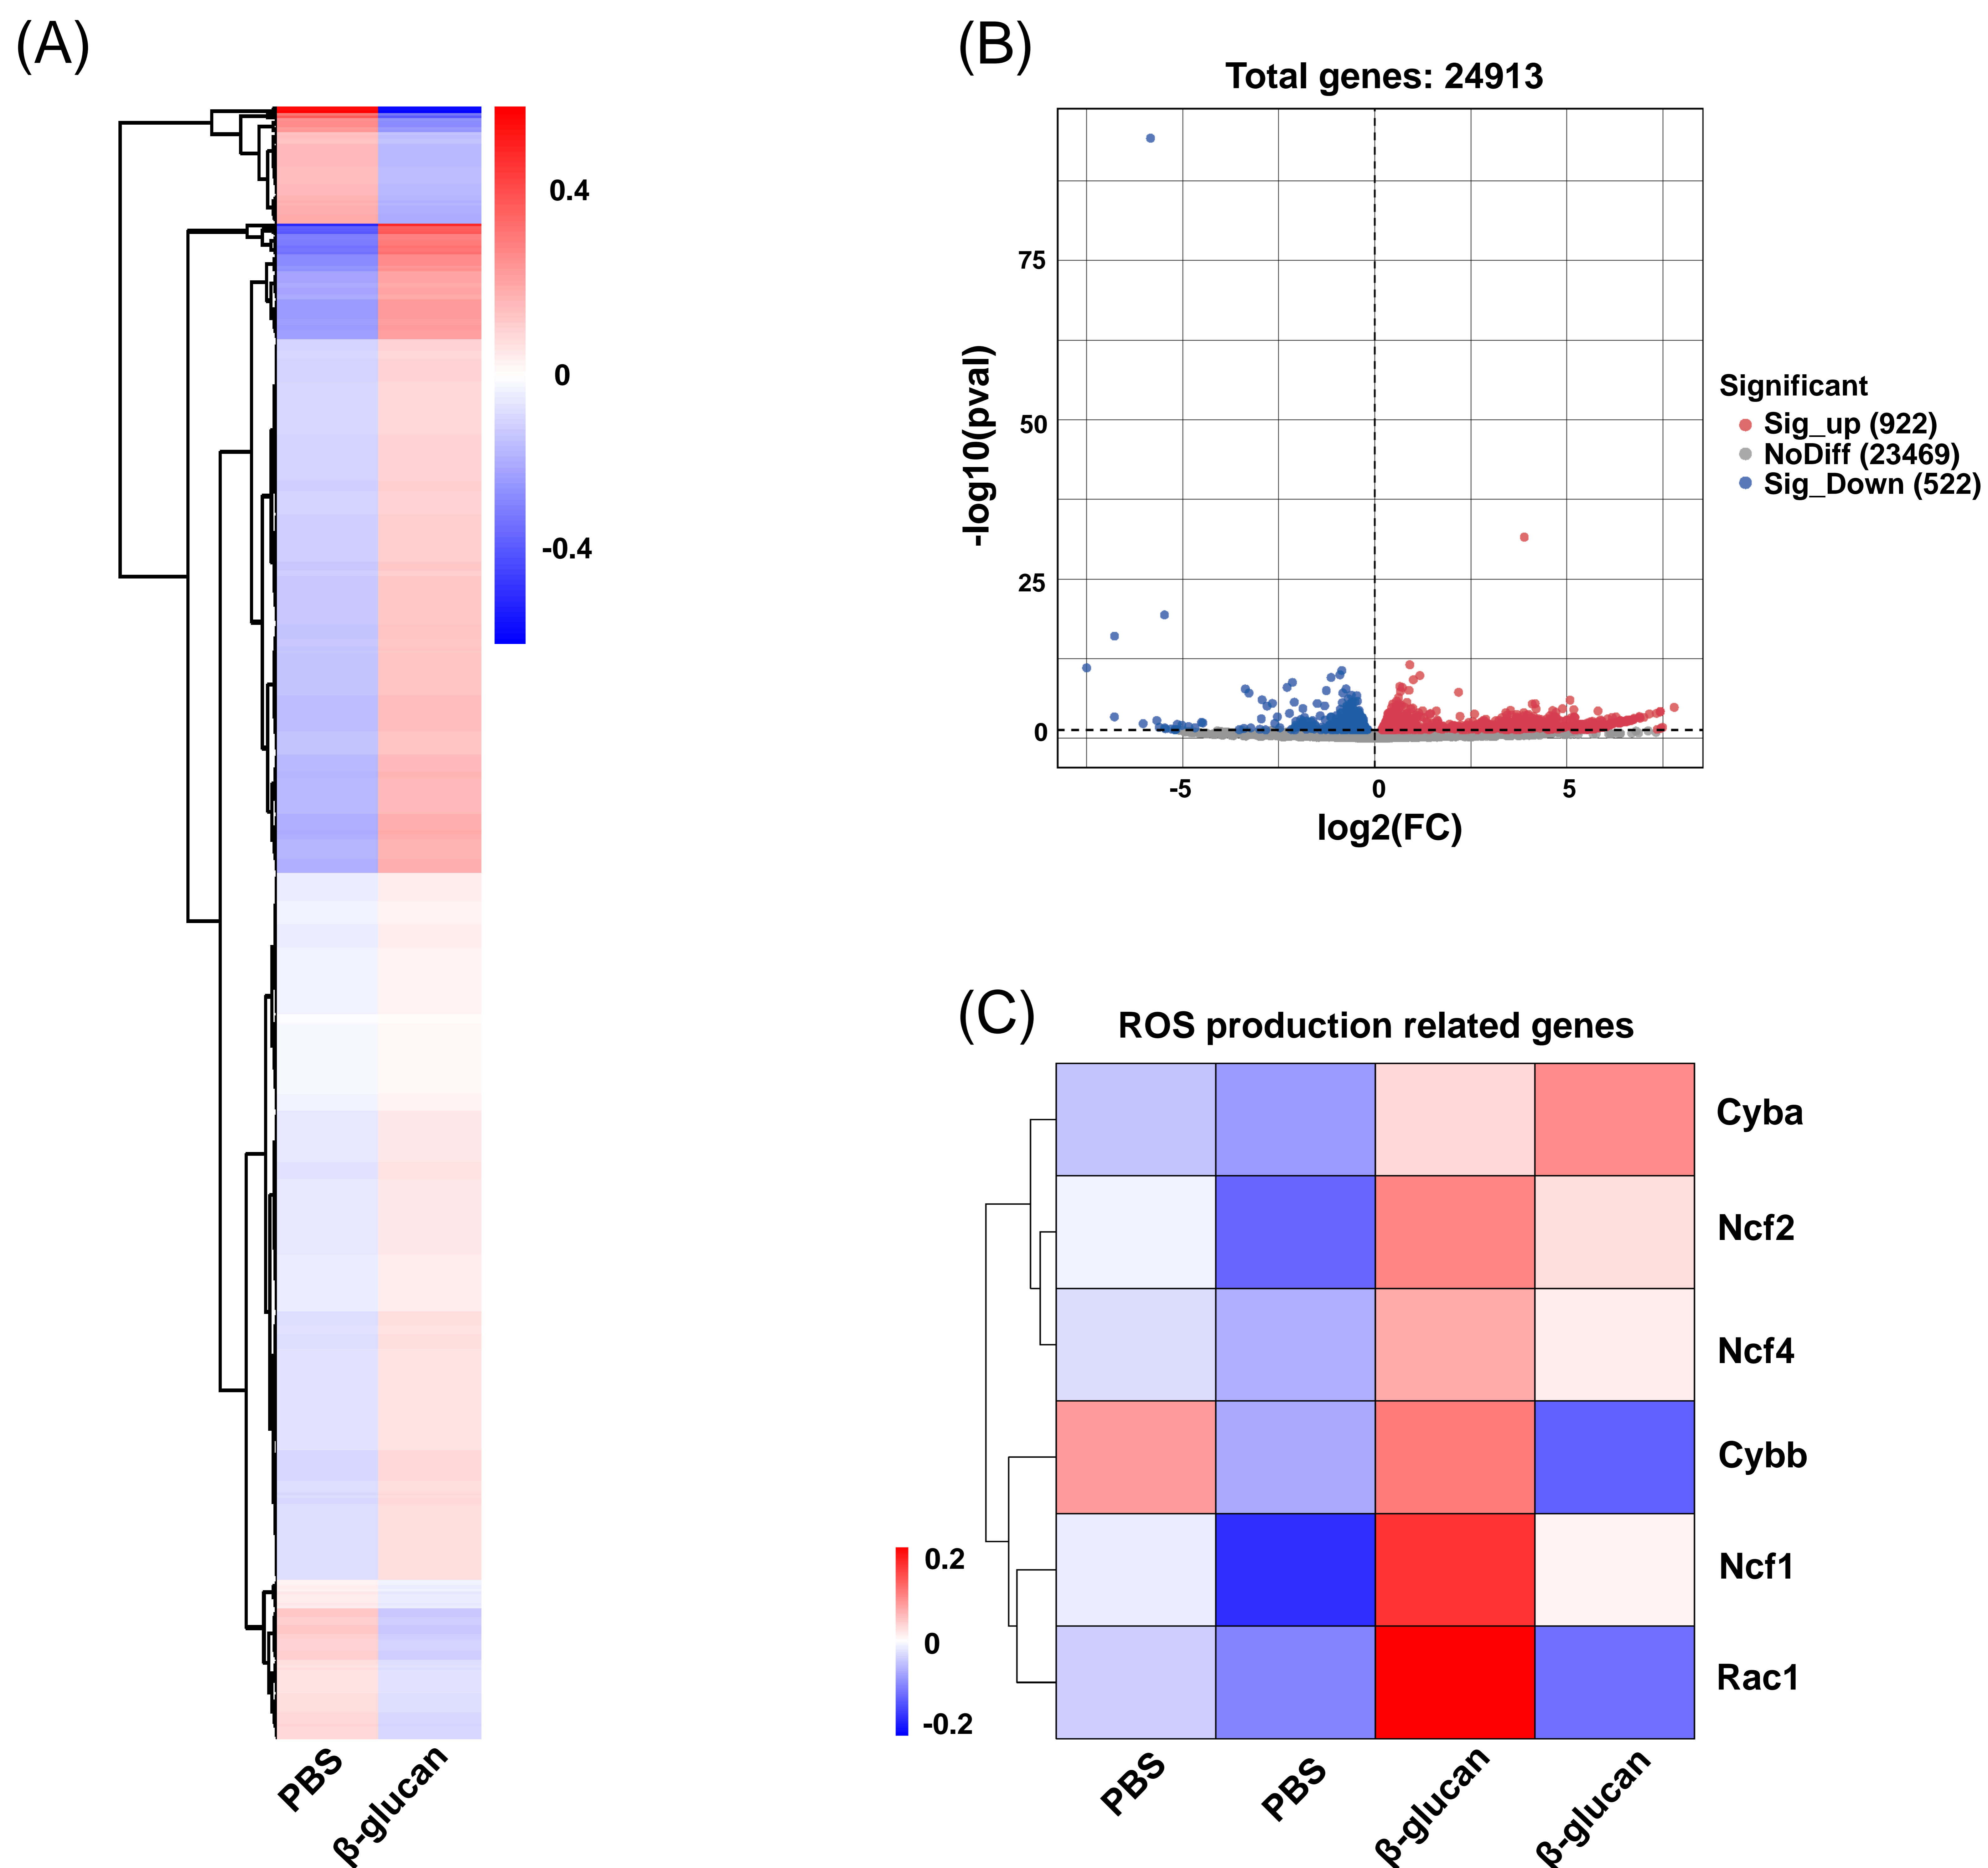

**Fig. S1.** mRNA transcripts of ROS production molecules on PMN-MDSCs. Neonatal mice at postnatal days 3-4 were injected intraperitoneally with 0.5 mg of  $\beta$ -glucan in 50ul of PBS, or with PBS as a control. Mice were sacrificed and splenic PMN-MDSCs were analyzed by RNA-seq at day 3 after  $\beta$ -glucan treatment (n = 2). (A) Heatmap showing the expression of genes in the PMN-MDSCs between PBS and  $\beta$ -glucan-treated groups. (B) Volcano plot comparing differentially expressed genes from neonatal PMN-MDSCs. Red and blue dots represented up-regulated and down-regulated genes in  $\beta$ -glucan-treated PMN-MDSCs, and gray dots represented genes were not significant. (C) Heatmap as determined by RNA-seq showing ROS gene expressions in the PMN-MDSCs from  $\beta$ -glucan-treated neonatal mice.

**Figure S2. The flow cytometric gating for Lin<sup>-</sup> cells from neonatal mice**

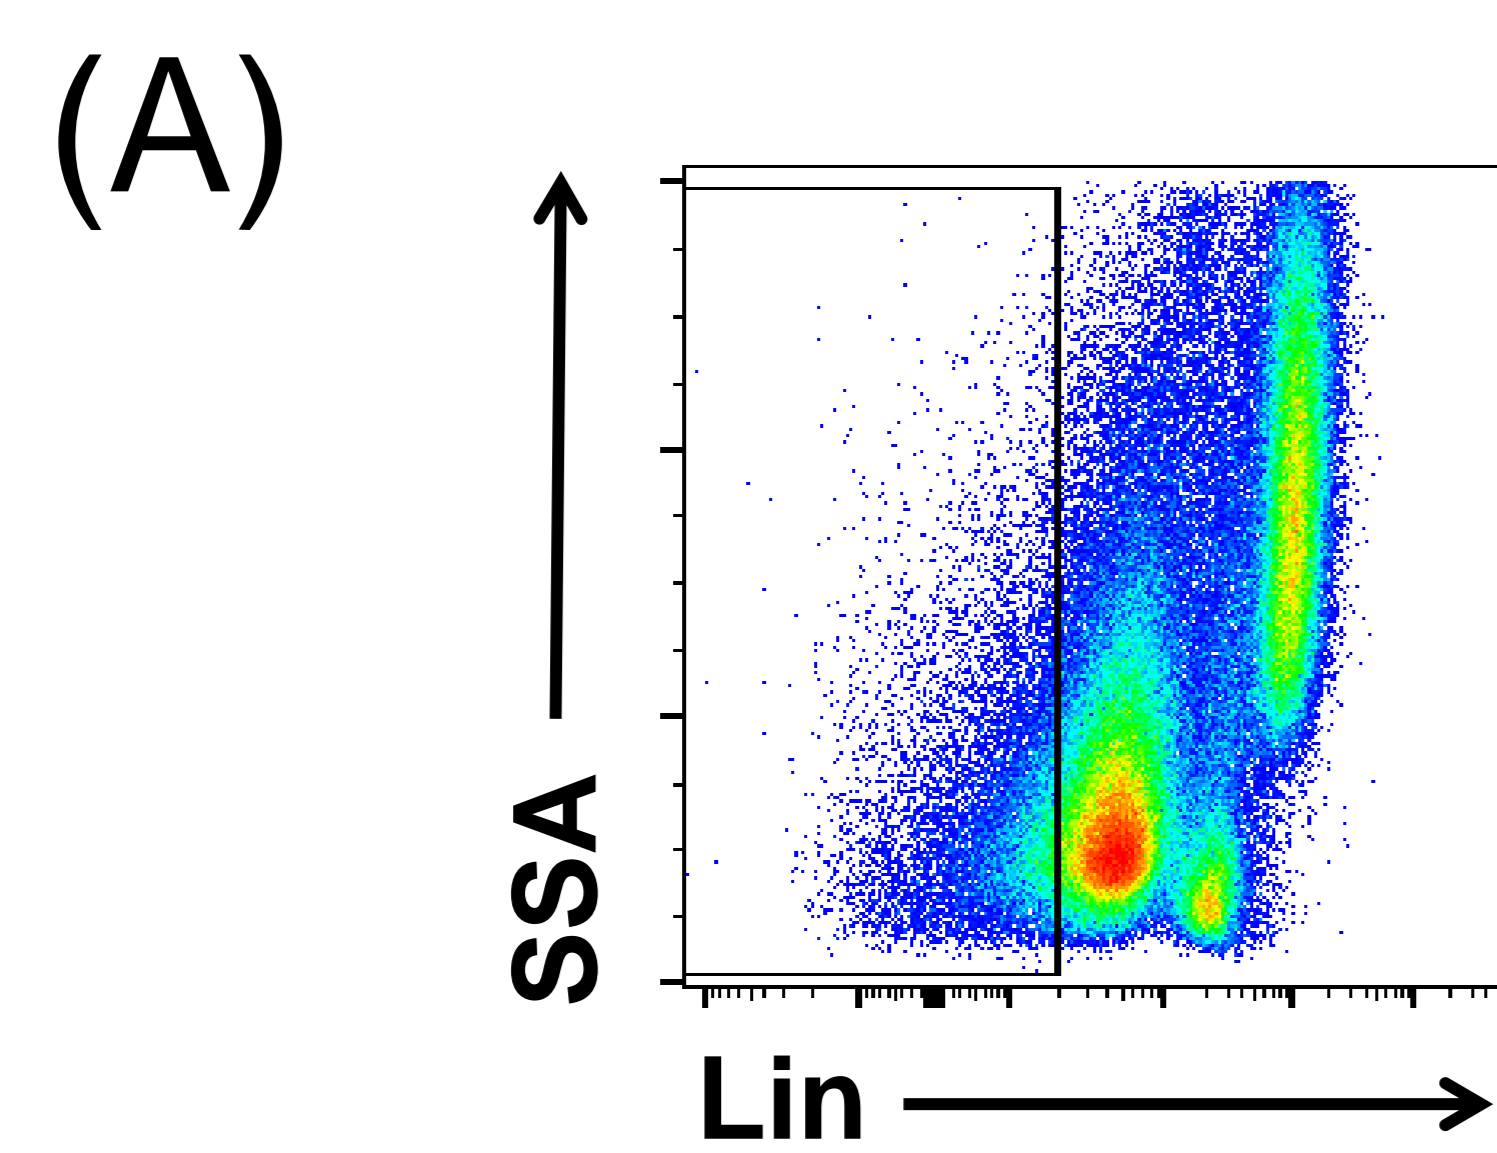

**Fig. S2.** The flow cytometric gating for Lin<sup>-</sup> cells from neonatal mice. (A) The flow cytometric gating for Lin<sup>-</sup> cells in the bone marrow from neonatal mice was displayed.

## Figure S3. ROS levels of neonatal M-MDSCs *in vivo* and *in vitro*

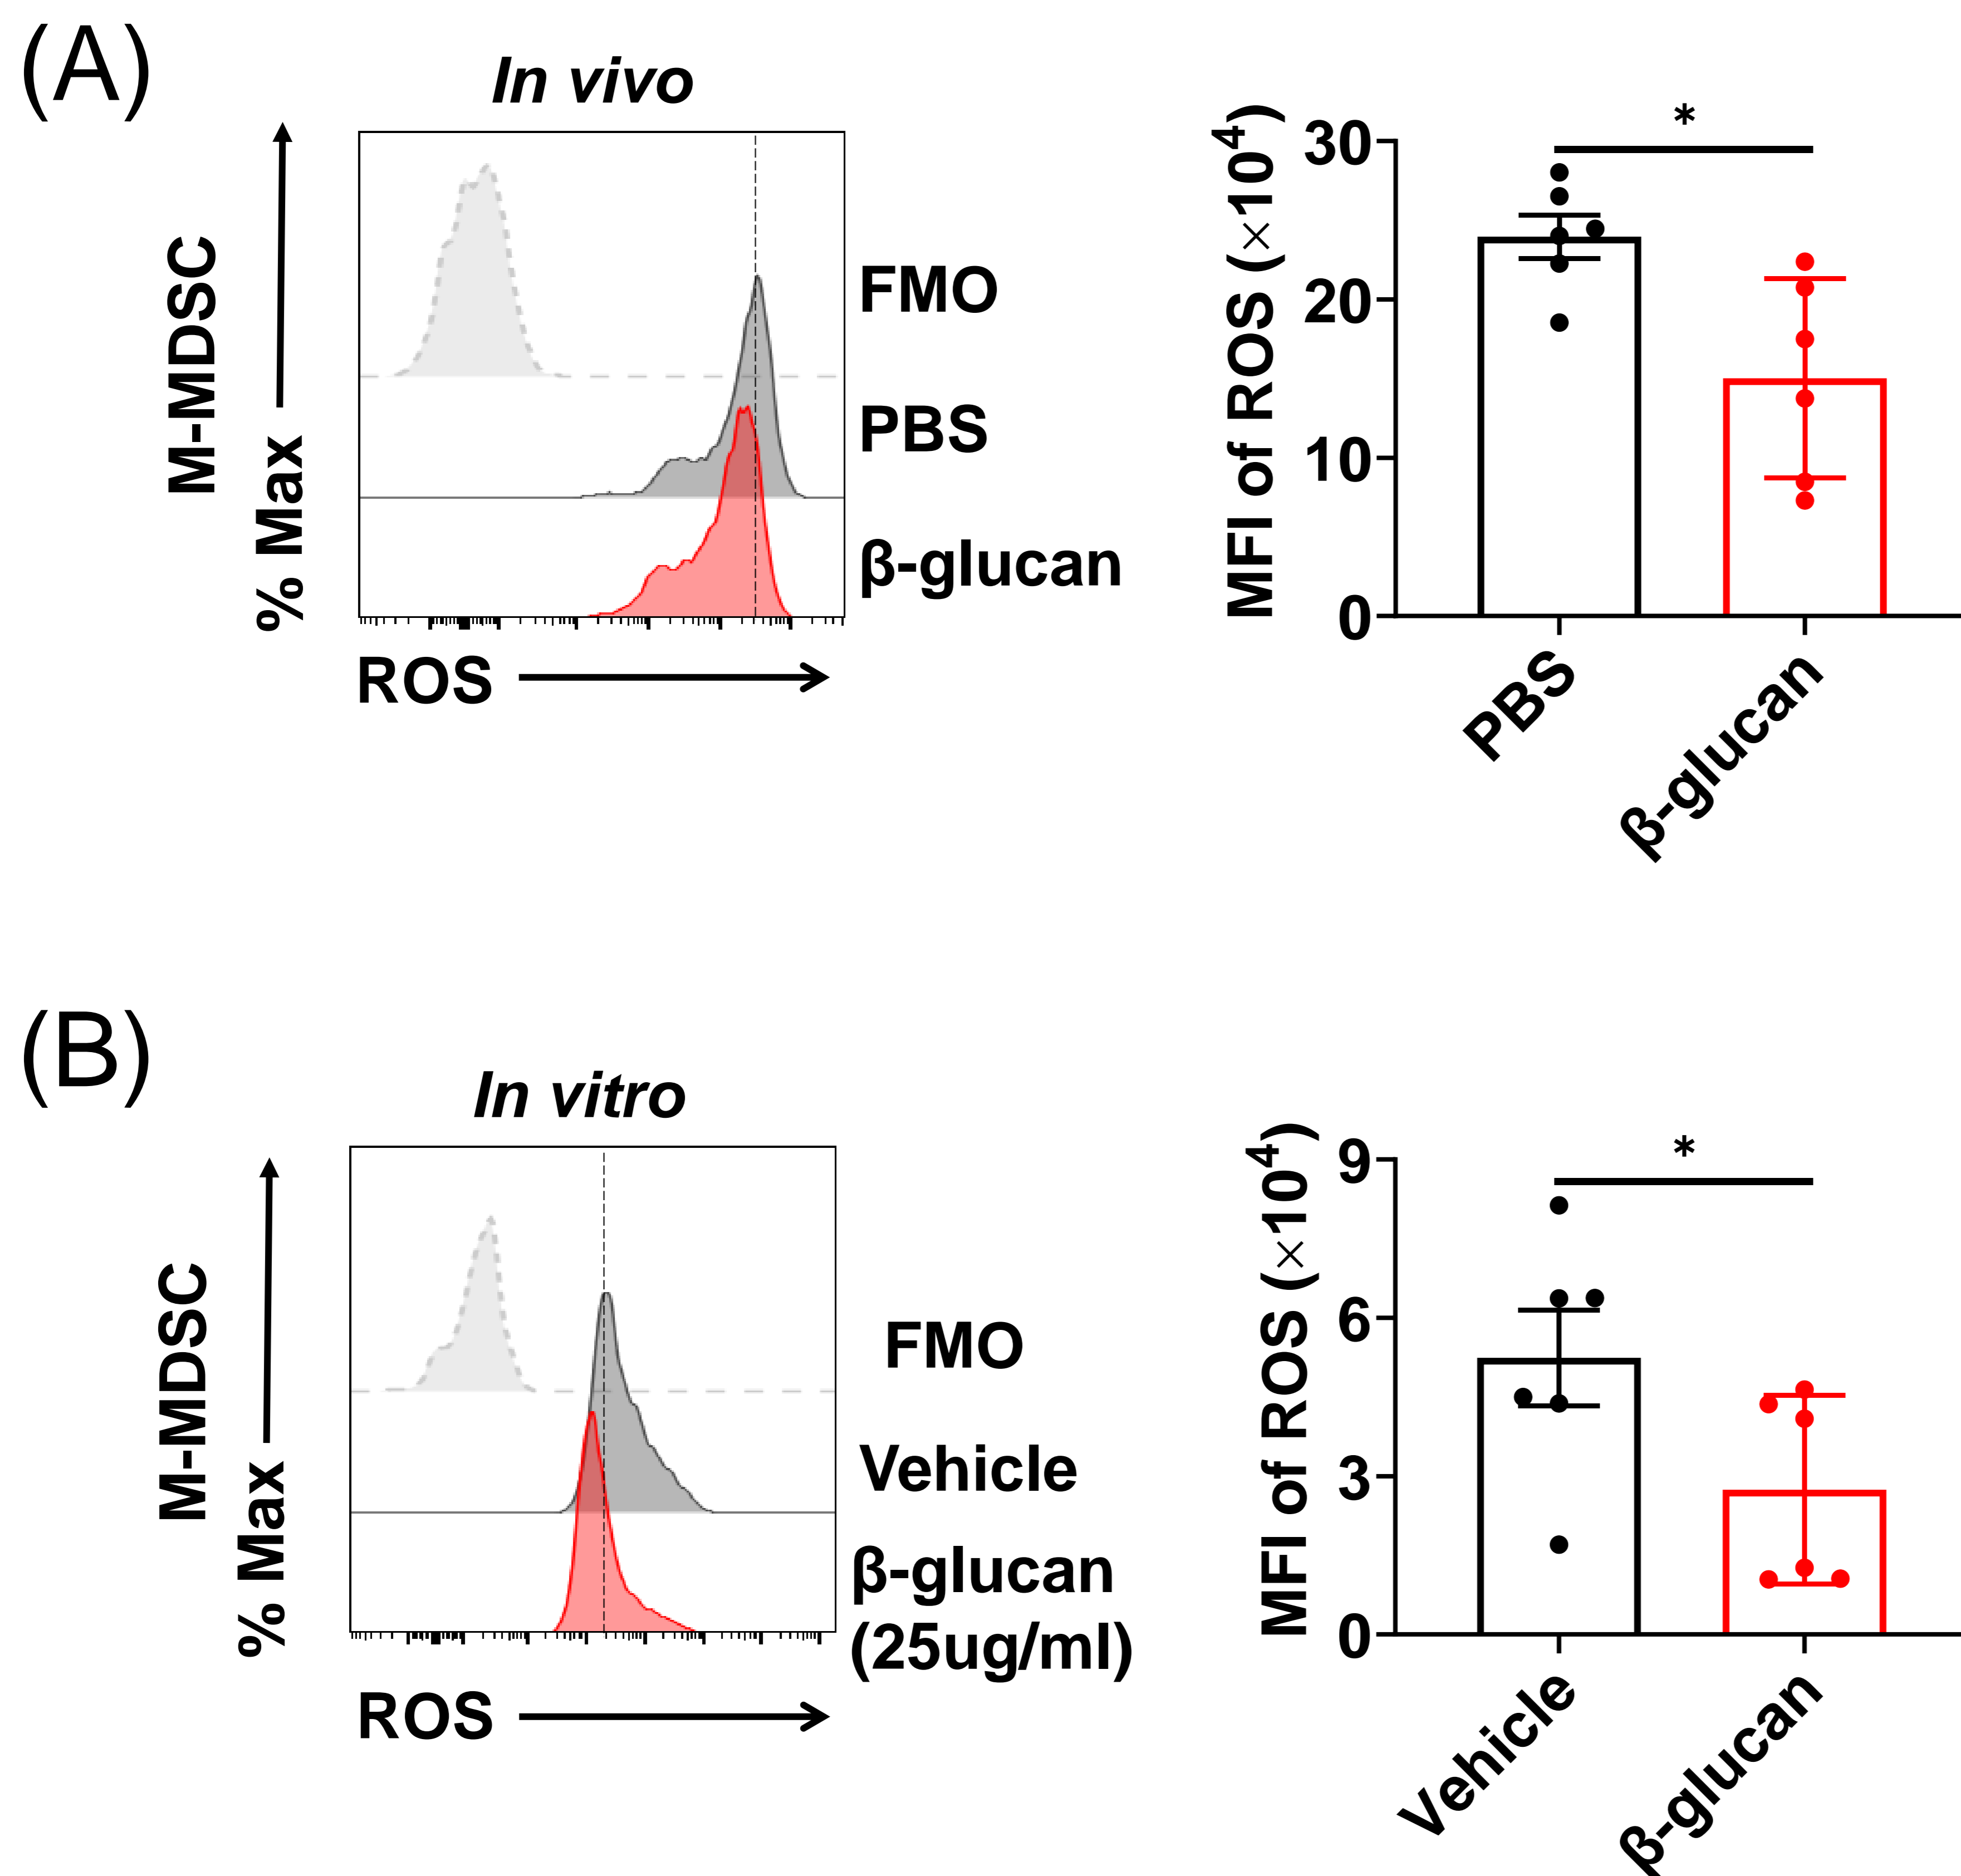

**Fig. S3.** ROS levels of neonatal M-MDSCs *in vivo* and *in vitro*. (A) Representative flow cytometry histogram (left) and mean fluorescence intensity (MFI, right) of ROS expression in M-MDSCs at day 3 after  $\beta$ -glucan treatment ( $n = 6$ ). (B) Representative flow cytometry histogram (left) and MFI (right) of ROS expression in M-MDSCs *in vitro* culture ( $n = 6$ ). Data represented mean  $\pm$  SEM from two independent experiments. \* $P < 0.05$ .
